# Supplementary material for: Crack formation and prevention in colloidal drops
Source: PubMed Central journal article supplement (PMC4538394; doi:10.1038/srep13166), 2015-08-17
Supplement: srep13166-s1.pdf [file srep13166-s1.pdf]

## Supplementary Information

### Crack formation and prevention in colloidal drops

Jin Young Kim, Kun Cho, Seul-a Ryu, So Youn Kim, and Byung Mook Weon\*

Brief explanations for supplementary movies:

| Name                  | Snapshot                                                                            | Comments                    |
|-----------------------|-------------------------------------------------------------------------------------|-----------------------------|
| Supplementary Movie 1 | 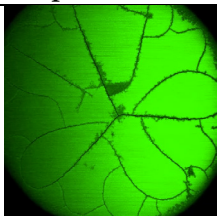   | Confocal movie for Fig. 2f. |
| Supplementary Movie 2 |   | Confocal movie for Fig. 3d. |
| Supplementary Movie 3 |  | Confocal movie for Fig. 4a. |
| Supplementary Movie 4 |  | Confocal movie for Fig. 4b. |
| Supplementary Movie 5 |  | Confocal movie for Fig. 4c. |
| Supplementary Movie 6 |  | Confocal movie for Fig. 4d. |

\*E-mail: [bmweon@skku.edu](mailto:bmweon@skku.edu)
